# Supplementary material
Source: PubMed Central journal article supplement (PMC5500148)
Supplement: 1521File002.pdf [file 1521File002.pdf]

## Supplementary Material

### Supplementary Methods

#### Quantitative PCR Experiments

For real-time PCR experiments, late L4 and early adult *C. elegans* were harvested and quantitative RT-PCR was performed as detailed previously (SIMON *et al.* 2008).

#### RIG-3 polyclonal Antibody generation and Immunoprecipitation

To generate the RIG-3 polyclonal antibodies, RIG-3 was expressed in pGEX4T-1 as a GST tagged fusion protein. Protein induction was done at 37°C for 3-4 hrs. The size of induced protein was approximately 93 KDa (67, RIG-3; 26, GST tag). This clone was used for custom polyclonal antibody generation from Merck.

#### Primers and Constructs:

##### **pBAB#0013: Pmyo-3::CAM-1(FL)::GFP**

PRS051 Forward (*Xba*I site) CTAGTCTAGAAtgtctccccgaccagaagac

PRS080 Reverse (*Bam*HI site) CGCGGATCCatcagaatccatcctctgaata

##### **pBAB#0014: Pmyo-3::CAM-1(ΔIg):: GFP**

PRS051 (*Xba*I site) CTAGTCTAGAAtgtctccccgaccagaagac

PRS052 (*Sac*II) TCCCCGCGGctcgtctcccgaacttttgg

PRS053 (*Sac*II) TCCCCGCGGgtctcaaatccagcagcctc

PRS054 (*Xho*I) CCGCTCGAGactcgttggtcatc

Deletion of the Ig domain was obtained by overlap extension PCR. PRS051 and PRS 052 were used to amplify the N-terminal region of the Ig domains. PRS053 and PRS054 were used to amplify C-terminal region of Ig domain. Finally the fragment with Ig domain deletion was amplified by overlap extension PCR by using oligos, PRS051 and PRS054 and cloned into the *Xba*I and *Xho*I sites in CAM-1 containing construct.

##### **pBAB#0038: Pmyo-3::CAM-1(FL)**

To obtain this construct, pBAB#0013 was digested with *Kpn*I and *Sac*I. This removed the GFP fragment and the sticky ends were made blunt by adding T4 DNA polymerase to perform 3'

## Supplemental Material

overhang removal. Following this ligation was performed and the expected construct was obtained by transformation.

### **pBAB#0039: *Pmyo-3::CAM-1(ΔIg)***

This construct was obtained from BAB#0014 by following the same protocol as given above for pBAB#0038.

### **pBAB#0015: *RIG-3::GST***

PRS074 (*Bam*HI) CGCGGATCCggacgactacttgccaag

PRS075 (*Not*I) ATGCGGCCGCcgtggcaagggcaagagg

### **pBAB#0021: *Punc-17::LIN-44***

PRS029 (*Nhe*I) CTAGCTAGCatgcgagcagctccttttg

PRS030 (*Kpn*I) GGGGTACCgcttttcggcggtgtccat

### **pBAB#0023: *Punc-129::LIN-44::mCherry***

PRS029 (*Nhe*I) CTAGCTAGCatgcgagcagctccttttg

PRS030 (*Kpn*I) GGGGTACCgcttttcggcggtgtccat

### **pBAB#0037: *Pmyo-3::HMP-2***

PRS335 (*Nhe*I) CTAGCTAGAatgcttcttactctaccaactc

PRS336 (*Kpn*I) GGGGTACCcacaattggtacgataccgatttg

### **pBAB#0040: *Pmyo-3::CAM-1(FL)::VC155***

### **pBAB#0041: *Pmyo-3::CAM-1(ΔIg)::VC155***

### **pBAB#0042: *Punc-17::RIG-3::VN173***

### **pBAB#0043: *Punc-17::RIG-3(GPI anchor swapped with TM domain of NLG-1)***

PRS389 (*Nhe*I) CTAGCTAGCatgggacgactacttgcc

PRS390 (*Kpn*I) GGGGTACCcttagacctgtatcttccaatgctc

### **pBAB#0044: *Pmyo-3::CAM-1(ΔKr)::VC155***

### **pBAB#0045: *Pmyo-3::CAM-1(ΔCRD)::VC155***

### **pBAB#0046: *Pmyo-3::CAM-1(Ig domain replaced with non-coding domain)::VC155***

### **pBAB#0047: *Pmyo-3::CAM-1(Kr & CRD replaced with Ig domains)::VC155***

### **pBAB#379 : *LIN-44::GFP***

### **pBAB#0048: *Punc-129::CAM-1(FL)::VC155***

### **pBAB#0049: *Punc-129::CAM-1(ΔIg)::VC155***

The inserts for the plasmids pBAB#0040-47 were custom generated and cloned into *Xba*I and *Kpn*I sites under the *myo-3* promoter (pBAB#0040-41 and 44-47) or the *unc-17* promoter (pBAB#0042, 43) in the pPD49.26 vector.

**Custom synthesized constructs for Bi-Fluorescence Complementation (BiFC)**

**Experiments**

RIG-3::VN173

CTAGCTAGCatgggacgactactgccaagatgctcttccctcttgcgatgtgtcttttcttccgagtttccgcatcagatagtc  
atctccaatgaggcaaatcctatcgtcatttcacagaaGTGAGCAAGGGCGAGGAGCTGTTACCCGGGG  
TGGTGCCCATCTGGTCGAGCTGGACGGCGACGTAAACGGCCACAAGTTCAGCGT  
GTCCGGCGAGGGCGAGGGCGATGCCACCTACGGCAAGCTGACCCTGAAGCTGATC  
TGCACCACCGGCAAGCTGCCCGTGCCCTGGCCACCCTCGTGACCACCCTGGGCTA  
CGGCCTGCAGTGCTTCGCCCCGCTACCCCGACCACATGAAGCAGCACGACTTCTTCA  
AGTCCGCCATGCCGAAGGCTACGTCCAGGAGCGCACCATCTTCTTCAAGGACGA  
CGGCAACTACAAGACCCGCGCCGAGGTGAAGTTCGAGGGCGACACCCTGGTGAAC  
CGCATCGAGCTGAAGGGCATCGACTTCAAGGAGGACGGCAACATCCTGGGGCACA  
AGCTGGAGTACAACAGCCACAACGTCTATATCACCCGCCGACAAGCAGAA  
GAACGGCATCAAGGCCAACTTCAAGATCCGCCACAACATCGAGggcgggcgggctccggc  
ggcgggcgggctccggcgggcgggctccggcgggcgggcCATGGATTACGACACAAACACAATCACAG  
TCAGAGAAGGAAAGAAGTTAATGGTTAGTTGTGTATTTGAAAGTGACGAACAAAT  
CCACAAAAGTGATCTTCTTTGGAAACAAGCTAATGGAAACAATATCGACGGAGAA  
TCCAATCCAAGTCTTTTCTGTGATTTTGAACGAAAAGGGGAGCAAACATCGCAA  
AACATCGCTACATTTCTCATCGGTTACACGAGAGACACCGGACTCTACACGTGCA  
CAGGAAGAAGTGTGGGGGAGAAAATTTGAGAAGACCATCAAATTGGTCTGACT  
CCCTGCCATTGAATGGAATGATAAAGATACTGTGAAGGGAGCACTTCTTGGAGAG  
CCCATCACAATTGACTGTGGAGTTAAGGGGCCATCCGGTAAAGAACCAATGATTC  
AGATGACAAATGGAAATGGTGAGCCACTCGATGAAGAAATCTGGACAATTGCTGG  
AAATGAAGCCACCATTGATAGCTTGAAAAAAGAGCATGCCGAGTTAACAGTGTCT  
TGTATTACTATTGAGATGCACCAGGAAACAAGCAAGGAAGAATTCCCAGTTGTTG  
ACAGAAAAGATGTTAACATCGAAGTTTACACCCTTCCCGAGTTTGAGACGGAAGA  
ATCTGTGCAGTACACAGTTATTGATAACCACGTCCGTGATGCAATTATCTACTGTA  
ATGTGACACATTCCTTCCCACCAGTTCGTCACTACACTTTTTATCACGGAGACGAG  
GAGATCAAGATGAGCGATAAATTCAACATTTTTGTGAATGTCGGAGTTTCTCAAG  
GAGCACATCTCAAATTCACAATGTCAATGAGAACGATTTGGGCACTTACAAATG  
CGAAGCTAACAATATCAAAGCAAAATCCTACCATACAATTCATCTTAGAGAAGCC  
AATGCCCCAGCTGAGCCAAAAGTAAGTCTTATCGAGGACAAGAGGCACTCCATCA  
TCTGGAAAGTAGAATCTATCGATCGAGATCCAGATCTTCCAATGACCGCCGTTGA  
AATTCGCCACCTCCGAGCCGGAACCGCCGAAGCTTCTGGAGTGTCCGATGAGGAT  
ATTTCTGATGCCTACTGGAAGAGTCACTCAATTTTCATGCAGAGAAATATCAAGGA  
TGATGGAATTTACGAAATTAATGGGCTAAGACATGGACATGAATATGTCTGGAGA  
TTCCGACAGATTAATGAAGCTGGATTTGGAGATAGTGTGGTATTGCGTGCAAAA  
CGTTAGATGATATGATGGATTCGGCATCTGACAGCAAATTTCTCTTGCCCTTGCC  
ACGTTATTTTTGTCTGTCTTTTTATCTAAGGGTACCC

CAM-1(FL)::VC155

atgtctccccgaccagaagacgacgatctcgtgatagaaccagccgacgatgagggtcttactacggaaatgcatcaatggagggt  
catcaactggtaacgaccgtacatcctctcacttctcaacttcaaatgccaccCAGAAGAACGGCATCAAGGCC  
AACTTCAAGATCCGCCACAACATCGAGGACGGCGGCGTGCAGCTCGCCGACCACT  
ACCAGCAGAACACCCCCATCGGCGACGGCCCCGTGCTGCTGCCCGACAACCACTA  
CCTGAGCTACCAGTCCAACTGAGCAAAGACCCCAACGAGAAGCGCGATCACAT

## Supplemental Material

GGTCCTGCTGGAGTTCGTGACCGCCGCGGGATCACTCTCGGCATGGACGAGCTG  
TACAAGggcggcgggcggtccggcgggcggtccggcgggcggtccggcgggcggcAAAAGTTCGGG  
AGACGAGGTTCCGGTTAAGTGCGAAGCACTTGGAACCCCACTCAAATTTATA  
TGGCTCAAAAACAATGGTCCAGTGGAAAAGACGAAACGAGTGGAAAATTCGTGAT  
AAGGAGAATTCATCTCGACTAGTCATTACACAATTGGACGTATTAGACAGTGGAT  
ACTATCAATGCATTGTCTCAAATCCAGCAGCCTCGGTTAACACGACAAGTGTGCT  
CAGGGTGAACAACGTGCCGGATGCGGTGAAATTGTCACAGAAGAAAGGATCACA  
TCACTCGACAAAACATATTGCATTTCGACGAGTACGAGGACTACGAGATGATGGAT  
CGTGGACGGTTACCAGACGAAGAAGACGCAGACCTTACCGTGTCCCTGACTCAG  
CAGCTGGCTCCAACACTACGCCCTGTCGCTGTATCAGAACGATGGCTAGATGGTAT  
CAAATACCGTGTGGCGACTGTGTCCAGTATCGTGGTGAAGCGTGTTCGACAGTAC  
TTGTCCAACAAGTTTGTAAATGATGACCAACGAGTCTCGAGAGGAAATGTATGACA  
TTGACCGTAATCTTCGAGCCGCCATGTTGTTTCATCAACGGAGCACCGACGATCTCT  
CAAAGTGTTCGGCAACTATCACAGGCGGTTCGTTGTCATCATATGTATAAAGTTT  
GCGAATCGGATTCTAACAATCAAATTGTTTCGATTTGCAAGCACGATTGTGACGTT  
ATTCAGAATGACGAATGCCCATCAGAATTGGCACTTGCCGCGCAACACGAATTGG  
TTGGGGATACACCAAAGGCGTTATTCCCGTTGTGTTCTCGGTTATCATCTACATCA  
AATTGTATTCCGGTTATGAGCACGGCGCTTCAGAGTAGCCCCGTTGCCGAAGTAA  
ATCGTGGTCATCTTACCCATTGGTGTATGTGAACAGTGGTACACAATACGAAGG  
AACCGTTGCCCAAACATCATCTGGAAAGCAATGTGCTCCATGGATCGACTCGACA  
TCTCGTACTTTAATGTTTCATCGTTTCCCAGAACTTATGAATTCTAAAACTATTG  
CCGAAACCCAGGTGGCAAGAAGAGCCGTCCATGGTGCTATTCAAAGCCAATGGG  
CAAGAGGAATACTGTGATGTTCCACAATGTCCAAGTGATATGTATCCTCATTGTA  
ATGATAAGAAAGTGGAGGGAAGCACAAAAGGAGGCGTCTCAGAGTCTGTAACAG  
CTCTTTGGGATTCTCTTGATCCTACAATGCAAGTAGCTCTTGTTGGTGGTGGAGTA  
TTCTTTCCCTTTACTTCTTTTGTCTGTGCGTGTGCTGTGCGAGCAAAG  
AAGAAGTCTCAAAGACACGTCATCAGAATGCACATTGCTCCAGTGCTCCTTCTG  
TGATCAATAGTGCCGCAATTCTGCATATTATCGGAAATTAATGGAACAAGTAC  
ACCTATAATGGGACGGGTACCTTGGCTCCAACACTACGCCCTGTCGCTGTATCAGA  
ACGATGGCTAGATGGTATCAAATACCGTGTCCGGCGACTGTGTCCAGTATCGTGGT  
GAAGCGTGTGACAGTACTGCCAAAAGGGTTCCCCG

The sequences shown above represent the constructs utilized for the venus based BiFC interaction studies. The sequence shows signal sequence (lower case blue), part of the YFP variant venus (green), linker sequence (lower case red), Ig domain (lower case purple) and the gene sequence (black). These inserts were custom generated from Thermofisher GENEART. Six additional constructs have been generated and used as controls in these studies. In case of RIG-3(TMD), a construct was generated where the C-terminal 23 amino acids, encoding for the region allowing for the GPI anchor attachment in RIG-3 has been replaced with the transmembrane and cytosolic regions of the NLG-1 protein, the sequence of which is:

GCTCTCGGTGGCGTTATTTTCATCGGTTGTGGATTCTCATTATGAACGTTTGCCTA  
TTAATTGCTGTTTCGTAGAGAATGGGGAAAGAAGCGGCGGAACGAGAAGAAGTTTC  
AACTGCAGTATCAGACTTATAACTCCAACCATGGCGGCGGCGGGAACAATACAA  
CAGCTTAAACTCGCCGGAACCCTTACTATCCGCATCGCACAAGAAGTCAACTTCGA

## Supplemental Material

TGCGACCCGCGGGAATATCACCAACGTGTCCACGTCACGGACGTGCCGCGCTTGC  
GCTTCAAATAGCCGAGGTAACAGTTTGACTGCTGCTCAAGCACCGACATTGGAA  
GAGATACAGGTCTAA

In case of CAM-1, various domain encoding regions were deleted or swapped. The domain encoding regions are marked in the sequence above and are detailed here:

Ig domain (nucleotides 463-638, amino acids 155-213 indicated in purple), CRD domain (nucleotides 906-1305, 303-435, amino acids indicated in orange); Kringle domain (nucleotides 1353-1593, amino acids 452-531 indicated in brown).

In CAM-1( $\Delta$ Ig)::VC155, the Ig domain region was deleted. For the rest of the constructs we have swapped various domains as discussed below:

1. CAM-1( $\Delta$ Kr,  $\Delta$ CRD)+2 Ig domains::VC155- In this construct both CRD and Kringle domains have been replaced with Ig encoding amino acids from CAM-1 itself.
2. CAM-1( $\Delta$ CRD)::VC155- In this construct the CRD encoding amino acids have been removed
3. CAM-1 ( $\Delta$ Kr)::VC155- Here we have deleted the Kringle-domain encoding region
4. CAM-1 ( $\Delta$ Ig)+non-functional domain::VC155- Here the Ig domain of CAM-1 was replaced with a putative non-domain encoding DNA and the sequence of which is:

TCGGTTAACACGACAAGTGTGCTCAGGGTGAACAACGTGCCGGATGCGGTGAAAT  
TGTCACAGAAGAAAGGATCACATCACTCGACAAAACATATTGCATTCGACGAGTA  
CGAGGACTACGAGATGATGGATCGTGGACGGTTACCAGACGAAGAAGACGCAGA  
CCTCTACCGT

**Table S1. Description of mutant strains used in the study**

| Genotype              | Strain name and allele description                                                                                                                                                                                                                                     | References                                            |
|-----------------------|------------------------------------------------------------------------------------------------------------------------------------------------------------------------------------------------------------------------------------------------------------------------|-------------------------------------------------------|
| <i>rig-3(ok2156)X</i> | <b>RB1712.</b><br><i>rig-3(ok2156) X</i> . The <i>ok2156</i> mutation deletes 1.5kb of the <i>rig-3</i> gene, spanning exons 2–5 (including most of the Ig domains); consequently, <i>ok2156</i> is likely to give rise to a null mutation.                            | (SCHWARZ <i>et al.</i> 2009; BABU <i>et al.</i> 2011) |
| <i>cam-1(ak37)II</i>  | <b>VM3896.</b><br>The <i>cam-1(ak37)</i> deletion Mutation is a predicted null allele that causes uncoordinated locomotion. The <i>cam-1(ak37)</i> mutation removes 2.5 kb of the coding sequence, leaving intact only the coding sequence for the Ig and CRD domains. | (FRANCIS <i>et al.</i> 2005)                          |

Supplemental Material

|                       |                                                                                                                                                                                                                              |                             |
|-----------------------|------------------------------------------------------------------------------------------------------------------------------------------------------------------------------------------------------------------------------|-----------------------------|
| <i>lin-44(n1792)I</i> | <b>MT5383.</b><br>At 20°C about 50% of the hermaphrodites are <i>egl</i> . This mutant has a point mutation that causes a W100 to Amber change and is likely a null allele.                                                  | (HERMAN <i>et al.</i> 1995) |
| <i>hmp-2(qm39)I</i>   | <b>MQ468</b><br>This mutataion has some embryonic lethality and a high degree of larval lethality is seen. In later stages the anterior half of the body is short but well developed while the posterior is half is thinner. | (HEKIMI <i>et al.</i> 1995) |

**Table S2- List of Integrated lines:**

| S.no. | Plasmid                       | Integrated Line number | Source and reference                          |
|-------|-------------------------------|------------------------|-----------------------------------------------|
| 1     | <i>Pmyo-3::ACR-16::GFP</i>    | <i>nuls299</i>         | Josh Kaplan Lab (BABU <i>et al.</i> 2011)     |
| 2     | <i>CAM-1::GFP</i>             | <i>cwIs6</i>           | Wayne Forrester Lab (KIM AND FORRESTER 2003)  |
| 3     | <i>Punc-17::RFP</i>           | <i>nuls321</i>         | Josh Kaplan Lab (BABU <i>et al.</i> 2011)     |
| 4     | <i>Punc-25::GFP</i>           | <i>juls76</i>          | CGC (WU <i>et al.</i> 2007)                   |
| 5     | <i>Punc-129:: SYD-2::GFP</i>  | <i>nuls160</i>         | Josh Kaplan Lab (SIEBURTH <i>et al.</i> 2005) |
| 6     | <i>Pacr-2::mCherry::RAB-3</i> | <i>ufls63</i>          | Mike Francis lab (PETRASH <i>et al.</i> 2013) |

**Table S3- List of Transgenes and Arrays:**

| S.no. | Plasmid                                                    | Plasmid number        | Array number                     |
|-------|------------------------------------------------------------|-----------------------|----------------------------------|
| 1     | <i>Pmyo-3::CAM-1(FL)::YFP</i>                              | BAB#0013              | <i>indEx11</i>                   |
| 2     | <i>Pmyo-3::CAM-1(ΔIg)::YFP</i>                             | BAB#0014              | <i>indEx17</i>                   |
| 3     | <i>Pmyo-3::CAM-1(FL)</i>                                   | BAB#0038              | <i>indEx25</i>                   |
| 4     | <i>Pmyo-3::CAM-1(ΔIg)</i>                                  | BAB#0039              | <i>indEx26</i>                   |
| 5     | <i>Prig-3::mCherry::RIG-3 from (BABU et al. 2011)</i>      | KP#6298               | <i>indEx21</i>                   |
| 6     | <i>Pmyo-3::CAM-1(FL)::VC155</i>                            | BAB#0040              | <i>indEx41</i>                   |
| 7     | <i>Pmyo-3::CAM-1(ΔIg)::VC155</i>                           | BAB#0041              | <i>indEx42</i>                   |
| 8     | <i>Punc-17::RIG-3::VN173</i>                               | BAB#0042              | <i>indEx43</i>                   |
| 9     | <i>Punc-17::RIG-3::VN173 and Pmyo-3::CAM-1(FL)::VC155</i>  | BAB#0042 and BAB#0040 | <i>indEx44</i>                   |
| 10    | <i>Punc-17::RIG-3::VN173 and Pmyo-3::CAM-1(ΔIg)::VC155</i> | BAB#0042 and BAB#0041 | <i>indEx45</i>                   |
| 11    | <i>Punc-17::LIN-44</i>                                     | BAB#0021              | <i>indEx28, indEx29, indEx30</i> |

Supplemental Material

|    |                                                                                            |                       |                         |
|----|--------------------------------------------------------------------------------------------|-----------------------|-------------------------|
| 12 | <i>Punc-129::LIN-44::mCherry</i>                                                           | BAB#0023              | <i>indEx32</i>          |
| 13 | <i>Pmyo-3::HMP-2</i>                                                                       | BAB#0037              | <i>indEx46, indEx47</i> |
| 14 | <i>Pmyo-3::CAM-1(FL)::VC155</i> (injected into <i>cam-1</i> )                              | BAB#0040              | <i>indEx48, indEx49</i> |
| 15 | <i>Pmyo-3::CAM-1(ΔIg)::VC155</i> (injected into <i>cam-1</i> )                             | BAB#0041              | <i>indEx50, indEx51</i> |
| 16 | <i>Punc-17::RIG-3::VN173</i> in <i>rig-3</i> (injected into <i>rig-3</i> )                 | BAB#0042              | <i>indEx52, indEx53</i> |
| 17 | <i>Punc-17::RIG-3(TMD)::VN173</i> and <i>Pmyo-3::CAM-1::VC155</i>                          | BAB#0043 and BAB#0040 | <i>indEx54, indEx55</i> |
| 18 | <i>Punc-17::RIG-3::VN173</i> and <i>Pmyo-3::CAM-1(ΔKr)::VC155</i>                          | BAB#0042 and BAB#0044 | <i>indEx56, indEx57</i> |
| 19 | <i>Punc-17::RIG-3::VN173</i> and <i>Pmyo-3::CAM-1(ΔCRD)::VC155</i>                         | BAB#0042 and BAB#0045 | <i>indEx58, indEx59</i> |
| 20 | <i>Punc-17::RIG-3::VN173</i> and <i>Pmyo-3::CAM-1(ΔIg domain+non-coding domain)::VC155</i> | BAB#0042 and BAB#0046 | <i>indEx60, indEx61</i> |
| 21 | <i>Punc-17::RIG-3::VN173</i> and <i>Pmyo-3::CAM-1(ΔKr, ΔCRD) +2XIg domains::VC155</i>      | BAB#0042 and BAB#0047 | <i>indEx62, indEx63</i> |
| 22 | <i>Punc-129::LIN-44::mCherry</i> in <i>mig-14</i>                                          | BAB#0023              | <i>indEx34, indEx35</i> |
| 23 | <i>Pmyo-3::CAM-1(ΔIg)</i> in N2                                                            | BAB#0013              | <i>indEx71</i>          |
| 24 | <i>cwIs6; Pmyo-3::CAM-1(ΔIg)</i>                                                           | BAB#0014              | <i>indEx72</i>          |
| 25 | <i>Punc-129::RIG-3::VN173</i> and <i>Pmyo-3::CAM-1::VC155</i>                              | BAB#48 and BAB#0040   | <i>indEx73</i>          |
| 26 | <i>Punc-129::RIG-3::VN173</i> and <i>Pmyo-3::CAM-1(ΔIg)::VC155</i>                         | BAB#48 and BAB#0041   | <i>indEx74</i>          |
| 27 | <i>Punc-129::RIG-3(TMD)::VN173</i> and <i>Pmyo-3::CAM-1::VC155</i>                         | BAB#49 and BAB#0040   | <i>indEx75</i>          |
| 28 | <i>Punc-129::RIG-3(TMD)::VN173</i> and <i>Pmyo-3::CAM-1(ΔIg)::VC155</i>                    | BAB#49 and BAB#0041   | <i>indEx76</i>          |

**Table S4- List of strains:**

| S. no. | Genotype                                         | Strain number | Source and reference |
|--------|--------------------------------------------------|---------------|----------------------|
| 1      | <i>rig-3(ok2156)</i>                             | RB1712        | CGC                  |
| 2      | <i>cam-1(ak37)</i>                               | VM3896        | CGC                  |
| 3      | <i>lin-44(n1792)</i>                             | MT5383        | CGC                  |
| 12     | <i>hmp-2(qm39)</i>                               | MQ468         | CGC                  |
| 20     | <i>lin-44(n1792); rig-3(ok2156)</i>              | BAB035        |                      |
| 21     | <i>lin-44(n1792); cam-1(ak37)</i>                | BAB036        |                      |
| 22     | <i>cam-1(ak37); rig-3(ok2156)</i>                | BAB037        |                      |
| 26     | <i>hmp-2(qm39); rig-3(ok2156)</i>                | BAB085        |                      |
| 27     | <i>hmp-2(qm39); cam-1(ak37)</i>                  | BAB086        |                      |
| 28     | <i>lin-44(n1792); cam-1(ak37); rig-3(ok2156)</i> | BAB087        |                      |
| 31     | <i>rig-3(ok2156); nuls299</i>                    | BAB060        |                      |
| 32     | <i>cam-1(ak37); nuls299</i>                      | BAB062        |                      |
| 33     | <i>lin-44(n1792); nuls299</i>                    | BAB069        |                      |

Supplemental Material

|    |                                              |        |  |
|----|----------------------------------------------|--------|--|
| 34 | <i>lin-44(n1792); rig-3(ok2156); nuls299</i> | BAB070 |  |
| 35 | <i>lin-44(n1792); cam-1(ak37); nuls299</i>   | BAB067 |  |
| 32 | <i>rig-3(ok2156); zwIs132</i>                | BAB802 |  |
| 33 | <i>cam-1(ak37); zwIs132</i>                  | BAB805 |  |
| 34 | <i>lin-44(n1792); zwIs132</i>                | BAB803 |  |
| 35 | <i>lin-44(n1792); rig-3(ok2156); zwIs132</i> | BAB804 |  |
| 36 | <i>lin-44(n1792); cam-1(ak37); zwIs132</i>   | BAB801 |  |
| 37 | <i>lin-44; zwIs132; indEx29</i>              | BAB806 |  |
| 38 | <i>hmp-2(qm39); nuls299</i>                  | BAB073 |  |
| 39 | <i>lin-44(n1792); nuls321</i>                | BAB064 |  |
| 40 | <i>rig-3(ok2156); indEx21</i>                | BAB079 |  |
| 41 | <i>cam-1(ak37); indEx11</i>                  | BAB066 |  |
| 42 | <i>cam-1(ak37); indEx17</i>                  | BAB067 |  |
| 43 | <i>cam-1(ak37); nuls299; indEx25</i>         | BAB057 |  |
| 44 | <i>cam-1(ak37); nuls299; indEx26</i>         | BAB058 |  |
| 45 | <i>cwIs6; indEx21</i>                        | BAB094 |  |
| 46 | <i>indEx41</i>                               | BAB826 |  |
| 47 | <i>indEx42</i>                               | BAB827 |  |
| 48 | <i>indEx43</i>                               | BAB828 |  |
| 49 | <i>indEx44</i>                               | BAB829 |  |
| 50 | <i>indEx45</i>                               | BAB830 |  |
| 51 | <i>lin-44(n1792); indEx28</i>                | BAB078 |  |
| 52 | <i>lin-44(n1792); indEx29</i>                | BAB082 |  |
| 53 | <i>lin-44(n1792); indEx30</i>                | BAB083 |  |
| 54 | <i>indEx32</i>                               | BAB077 |  |
| 55 | <i>rig-3(ok2156); indEx32</i>                | BAB079 |  |
| 57 | <i>hmp-2(qm39); indEx46</i>                  | BAB091 |  |
| 58 | <i>hmp-2(qm39); indEx47</i>                  | BAB097 |  |
| 59 | <i>rig-3(ok2156); indEx52</i>                | BAB831 |  |
| 60 | <i>rig-3(ok2156); indEx53</i>                | BAB832 |  |
| 61 | <i>cam-1(ak37); indEx48</i>                  | BAB833 |  |
| 62 | <i>cam-1(ak37); indEx49</i>                  | BAB834 |  |
| 63 | <i>cam-1(ak37); indEx50</i>                  | BAB835 |  |
| 64 | <i>cam-1(ak37); indEx51</i>                  | BAB836 |  |
| 65 | <i>hmp-2(qm39); rig-3(ok2156); nuls299</i>   | BAB819 |  |
| 66 | <i>indEx54</i>                               | BAB838 |  |
| 67 | <i>indEx56</i>                               | BAB839 |  |
| 68 | <i>indEx58</i>                               | BAB840 |  |
| 69 | <i>indEx60</i>                               | BAB841 |  |
| 70 | <i>indEx62</i>                               | BAB842 |  |
| 71 | <i>indEx64</i>                               | BAB843 |  |
| 72 | <i>indEx68</i>                               | BAB844 |  |
| 73 | <i>indEx69</i>                               | BAB845 |  |
| 74 | <i>indEx70</i>                               | BAB846 |  |
| 75 | <i>indEx71</i>                               | BAB847 |  |
| 76 | <i>indEx72</i>                               | BAB848 |  |



## Supplemental Material

|    |                                    |        |  |
|----|------------------------------------|--------|--|
| 77 | <i>indEx73</i>                     | BAB849 |  |
| 78 | <i>indEx74</i>                     | BAB850 |  |
| 79 | <i>indEx75</i>                     | BAB851 |  |
| 80 | <i>indEx76</i>                     | BAB852 |  |
| 81 | <i>nuIs160; lin-44</i>             | BAB853 |  |
| 82 | <i>lin-44; Punc-25::SYD-2::GFP</i> | BAB854 |  |

### References:

- Babu, K., Z. Hu, S. C. Chien, G. Garriga and J. M. Kaplan, 2011 The immunoglobulin super family protein RIG-3 prevents synaptic potentiation and regulates Wnt signaling. *Neuron* 71: 103-116.
- Francis, M. M., S. P. Evans, M. Jensen, D. M. Madsen, J. Mancuso *et al.*, 2005 The Ror receptor tyrosine kinase CAM-1 is required for ACR-16-mediated synaptic transmission at the *C. elegans* neuromuscular junction. *Neuron* 46: 581-594.
- Hekimi, S., P. Boutis and B. Lakowski, 1995 Viable maternal-effect mutations that affect the development of the nematode *Caenorhabditis elegans*. *Genetics* 141: 1351-1364.
- Herman, M. A., L. L. Vassilieva, H. R. Horvitz, J. E. Shaw and R. K. Herman, 1995 The *C. elegans* gene *lin-44*, which controls the polarity of certain asymmetric cell divisions, encodes a Wnt protein and acts cell nonautonomously. *Cell* 83: 101-110.
- Jensen, M., F. J. Hoerndli, P. J. Brockie, R. Wang, E. Johnson *et al.*, 2012 Wnt signaling regulates acetylcholine receptor translocation and synaptic plasticity in the adult nervous system. *Cell* 149: 173-187.
- Kim, C., and W. C. Forrester, 2003 Functional analysis of the domains of the *C. elegans* Ror receptor tyrosine kinase CAM-1. *Dev Biol* 264: 376-390.
- Petrash, H. A., A. Philbrook, M. Haburcak, B. Barbagallo and M. M. Francis, 2013 ACR-12 ionotropic acetylcholine receptor complexes regulate inhibitory motor neuron activity in *Caenorhabditis elegans*. *J Neurosci* 33: 5524-5532.
- Schwarz, V., J. Pan, S. Voltmer-Irsch and H. Hutter, 2009 IgCAMs redundantly control axon navigation in *Caenorhabditis elegans*. *Neural Dev* 4: 13.
- Sieburth, D., Q. Ch'ng, M. Dybbs, M. Tavazoie, S. Kennedy *et al.*, 2005 Systematic analysis of genes required for synapse structure and function. *Nature* 436: 510-517.
- Simon, D. J., J. M. Madison, A. L. Conery, K. L. Thompson-Peer, M. Soskis *et al.*, 2008 The microRNA miR-1 regulates a MEF-2-dependent retrograde signal at neuromuscular junctions. *Cell* 133: 903-915.
- Wu, Z., A. Ghosh-Roy, M. F. Yanik, J. Z. Zhang, Y. Jin *et al.*, 2007 *Caenorhabditis elegans* neuronal regeneration is influenced by life stage, ephrin signaling, and synaptic branching. *Proc Natl Acad Sci U S A* 104: 15132-15137.

## Supplementary Figures

Fig. S1

A

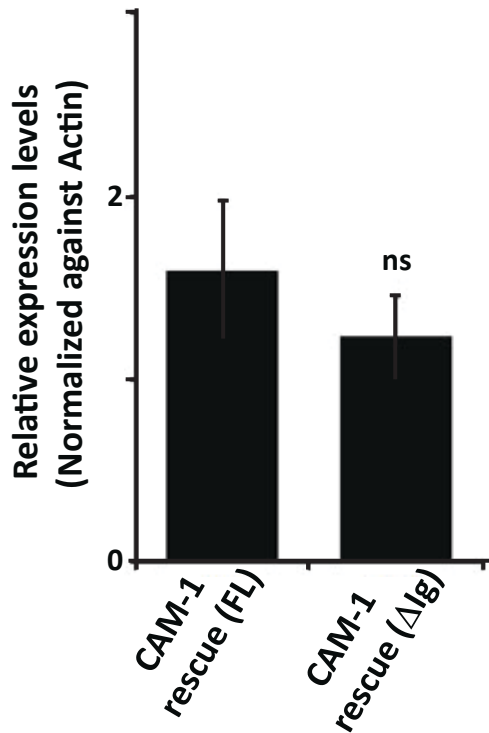

B

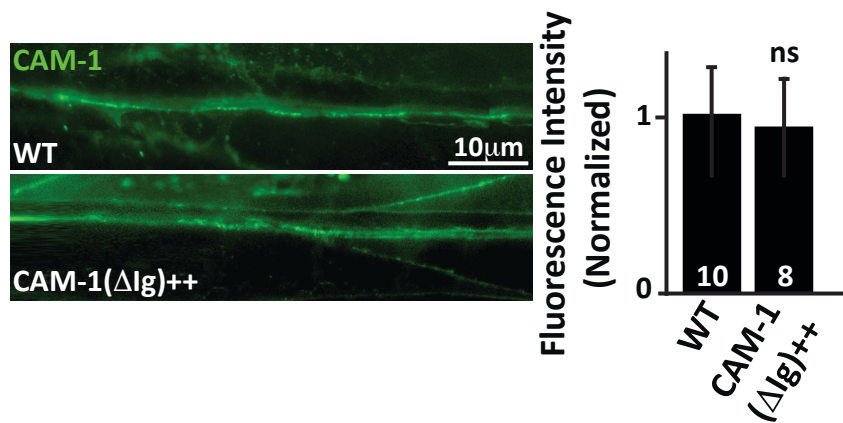

**Figure S1. Expression analysis of *Pmyo-3::CAM-1(FL)* and *Pmyo-3::CAM-1( $\Delta$ Ig)* rescue lines (Supplement to Fig. 1):**

S1A. The graph shows quantitative PCR values of the *Pmyo-3::CAM-1(FL)* and *Pmyo-3::CAM-1( $\Delta$ Ig)* array lines. The quantitative Reverse Transcription PCR values are plotted as normalized values against actin levels. It is evident from the graph that the expression pattern is similar for both the rescue constructs that were used in this experiment.

S1B. CAM-1::GFP fluorescent images using the *cwIs6* strain. This assay compared ventral cord fluorescence in *cwIs6* animals and *cwIs6 C. elegans* expressing the *Pmyo-3::CAM-1( $\Delta$ Ig)* construct. To the right is a bar graph quantitating CAM-1::GFP fluorescence along the ventral cord in the two lines. Error bars indicate S.E.M. In all figures “ns” indicates not significant and the numbers at the base of bar graphs indicate the number of animals imaged for that experiment.

Fig. S2

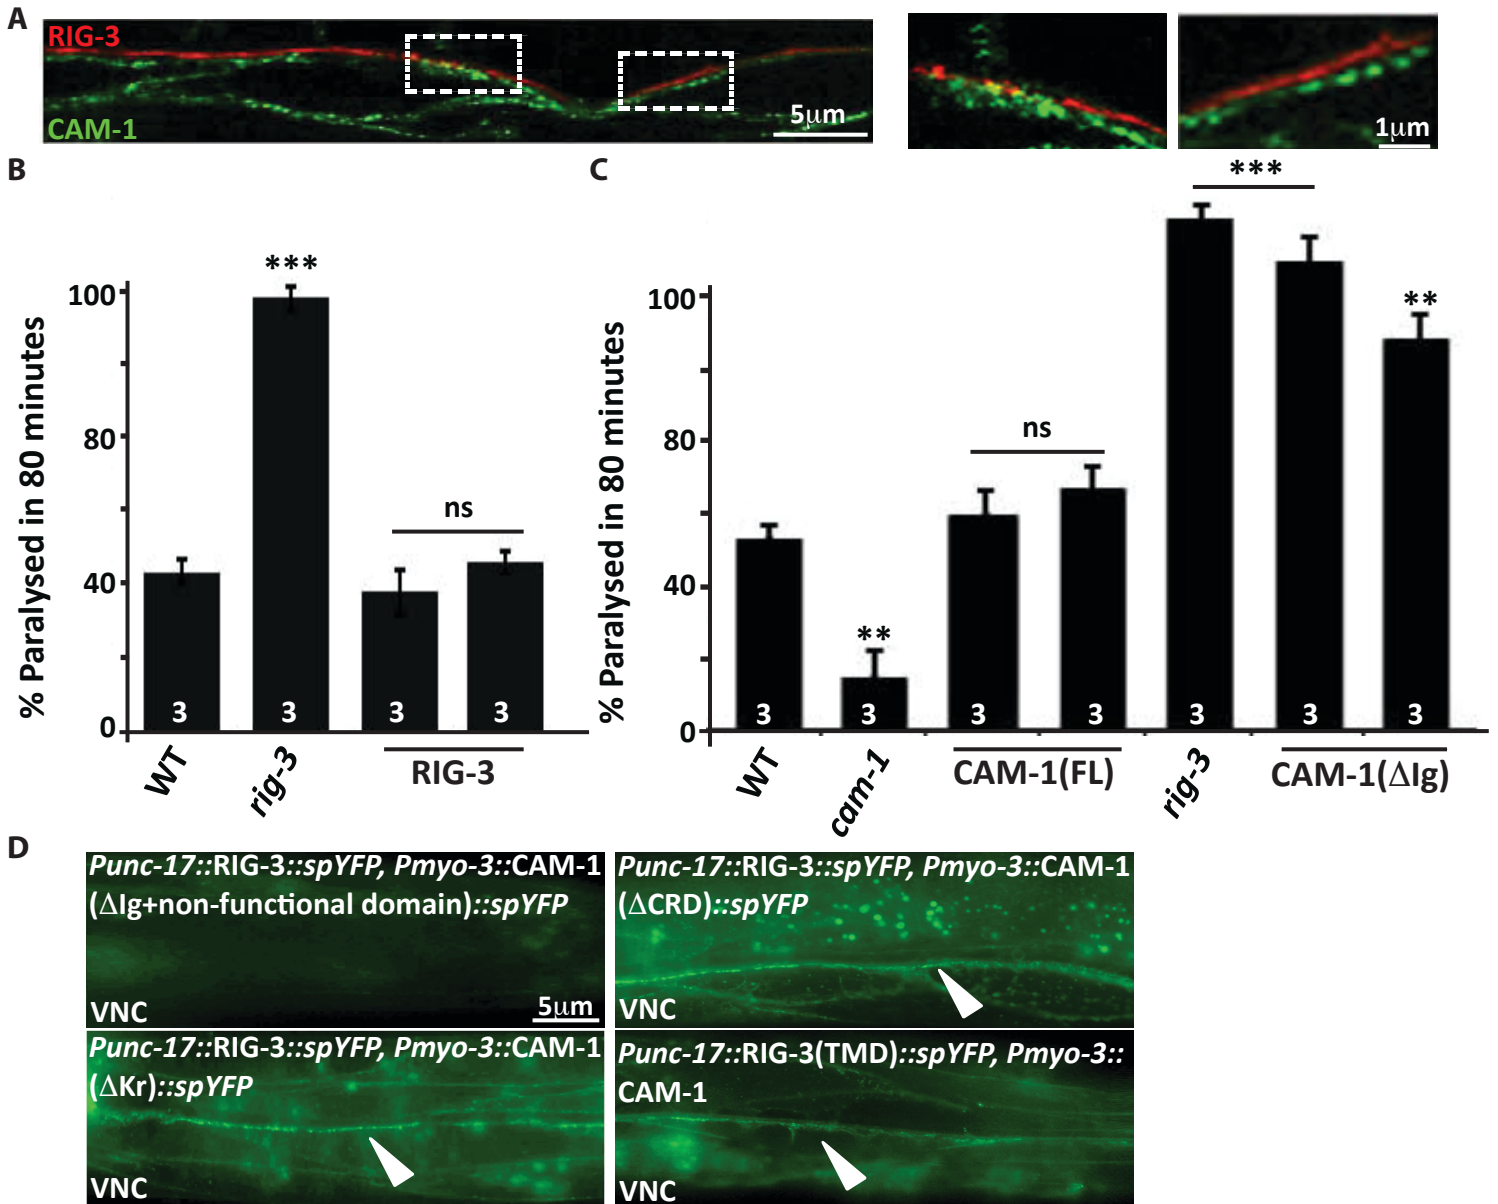

**Figure S2. Interaction between RIG-3 and CAM-1 (Supplement to Fig. 2):**

S2A. The expression pattern of RIG-3 and CAM-1 both tagged with fluorescence markers and expressed under their endogenous promoters indicates that they are expressed in regions opposing each other at the NMJ. The images shown in this panel are along the dorsal nerve cord of the animal. Shown in the lower panel are the zoomed-in regions of the boxed area in the top panel.

S2B and C. Aldicarb analysis of fusion proteins used in BiFC experiments: Aldicarb assays were performed with 1mM aldicarb and the number of *C. elegans* paralyzed at 80 mins were plotted as indicated in the bar graphs. RIG-3 rescue was done in cholinergic neurons under the *unc-17* promoter, while the CAM-1 rescue was done in body-wall muscle using the *myo-3* promoter. Two independent rescue array lines have been used in these experiments. In all aldicarb graphs the numbers at the base of the bar graphs indicate the number of times the experiment was performed with 15-25 *C. elegans* used in each trial, “\*” indicates  $p < 0.05$ , “\*\*\*” indicates  $p < 0.01$  and “\*\*\*\*” indicates  $p < 0.001$  in all figures. Unless otherwise indicated all p-values are with respect to WT animals. Error bars indicate S.E.M. in both panels.

S2D. BiFC between CAM-1 and RIG-3: The first panel indicates a CAM-1::spYFP construct where the Ig domain of CAM-1 was replaced by a non-functional domain and co-injected with RIG-3::spYFP. In the second and third panels Kringle and CRD domains were deleted from the CAM-1::spYFP construct and injected along with RIG-3::spYFP. The last panel shows RIG-3(TMD), where the GPI anchor region of RIG-3 is replaced with a transmembrane domain which was co-injected with CAM-1::spYFP. In all the experiments CAM-1 constructs were expressed in body-wall muscles while RIG-3 constructs were expressed in cholinergic neurons. In all cases except the absence of a functional Ig domain, CAM-1 and RIG-3 showed interaction as seen from the reconstituted YFP (arrowheads). All panels show representative images along the ventral nerve cord (VNC) of the animals. For each strain 10-12 animals were analyzed.

**Fig. S3**

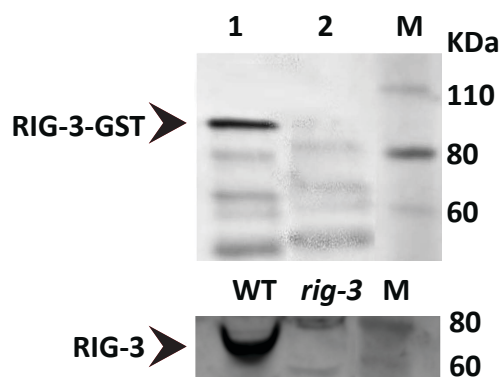

**Figure S3. RIG-3 antibody probe (Supplement to Figure 3):**

The upper panel shows an immunoblot of the RIG-3::GST fusion protein induced at 37°C for 3 hrs. Lane 1 shows the induced protein, lane 2 shows the un-induced control and lane M indicates the prestained marker. The lower panel shows the blot for protein extracted from WT and *rig-3* mutant *C. elegans* that has been probed with the RIG-3 antibody.

Fig. S4

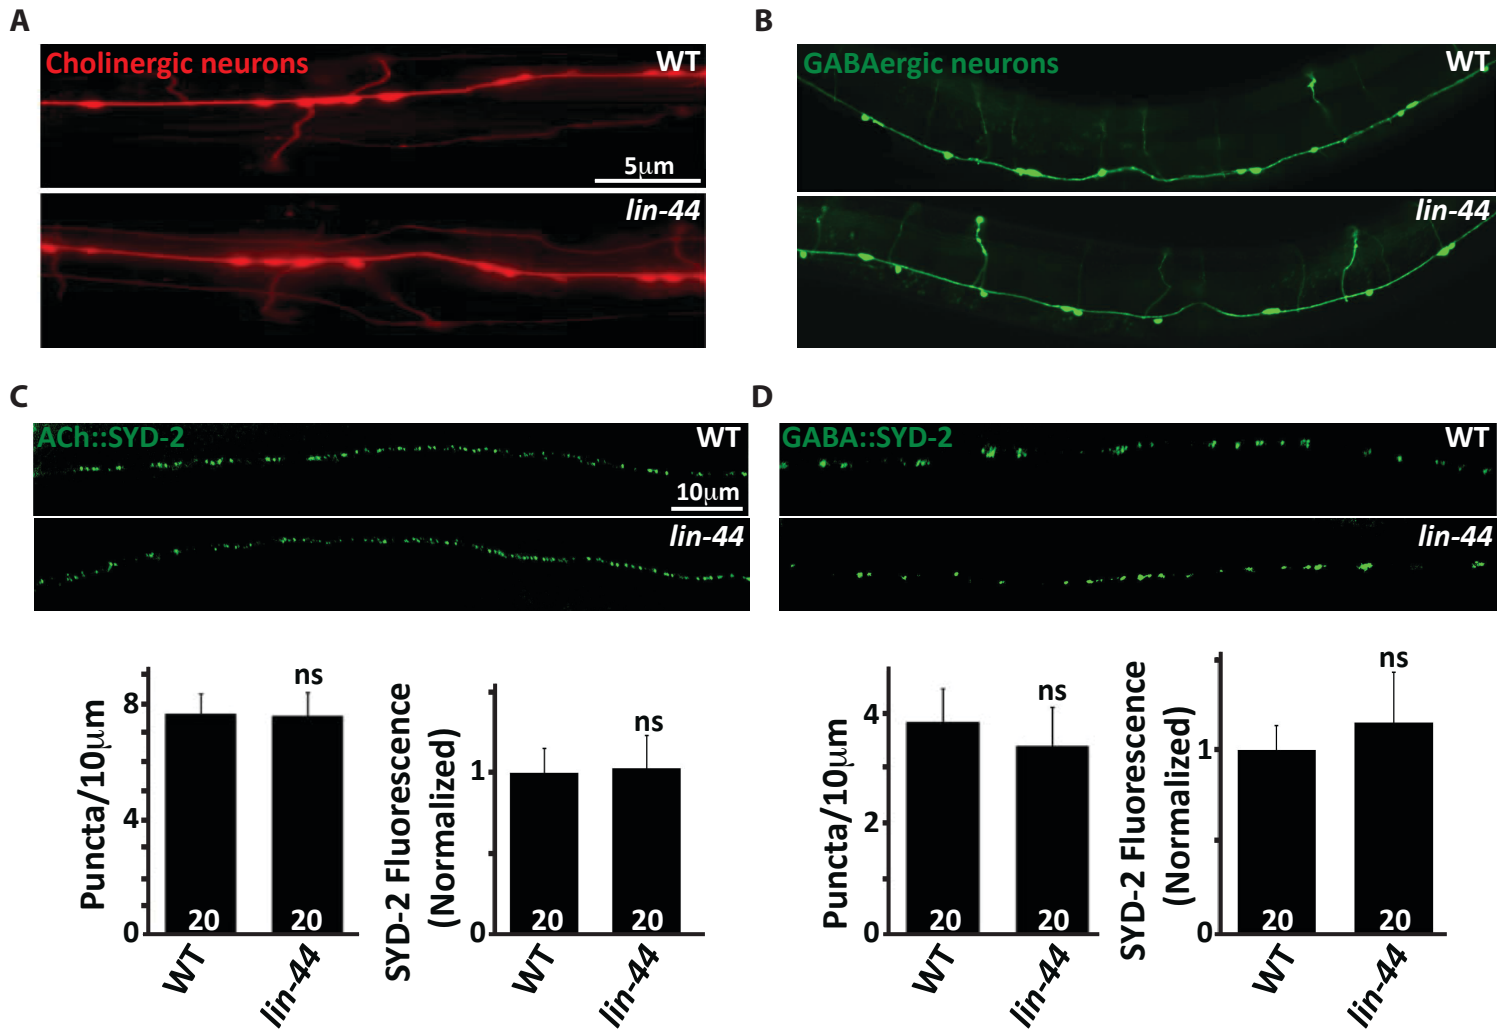

**Figure S4. Developmental analysis of *Wnt/lin-44* mutants (Supplement to Fig. 4):**

S4A and B. This panel shows representative images of *Punc-17::RFP* expression and *Punc-25::GFP* in WT and *Wnt/lin-44* mutant animals. There were no obvious defects seen in the *Wnt/lin-44* mutants in neuronal number, position or axon guidance using the *Punc-17::RFP* and *Punc-25::GFP* markers. 10-12 animals were analyzed for each genotype.

S4 C and D. Representative images and the summary data for an active zone protein SYD-2 ( $\alpha$ -Liprin) in the dorsal nerve cord of WT and *Wnt/lin-44* mutants. SYD-2 protein is GFP-tagged and expressed in DA motor neurons (using the *unc-129* promoter) and GABAergic motor neurons (using the *unc-25* promoter).

SYD-2 fluorescence intensity and the punctal density were analysed and plotted as represented in the graphs shown below the images. The number of animals analyzed is indicated for each genotype at the base of each bar graph. Error bars indicate SEM. No significant differences were observed.

Fig. S5

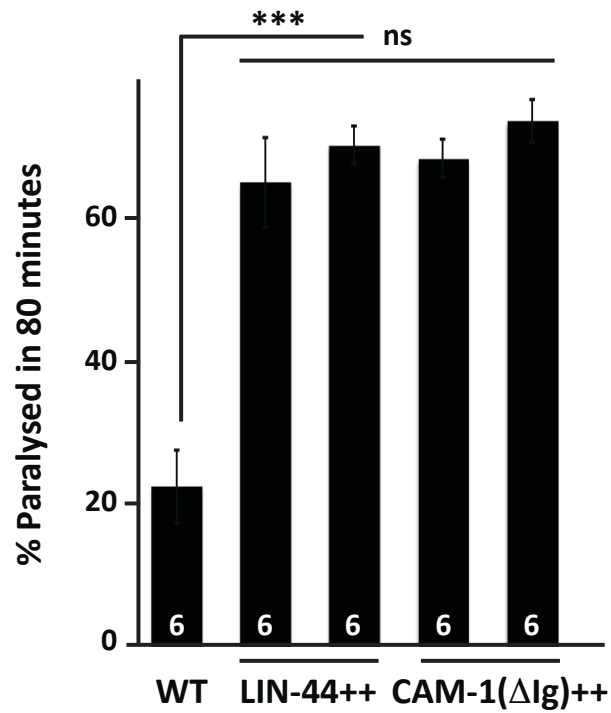

**Figure S5. Aldicarb Assays with LIN-44 and CAM-1( $\Delta$ Ig) overexpression strains (Supplement to Fig. 5):** Aldicarb assay of Wnt/LIN-44 expressed in cholinergic neurons (under the *unc-17* promoter) and CAM-1( $\Delta$ Ig) expressed in body-wall muscles (under the *myo-3* promoter). The bars represent *C. elegans* paralysed at 80 mins. Two independent array lines were used for each construct. Error bars indicate S.E.M.

Fig. S6

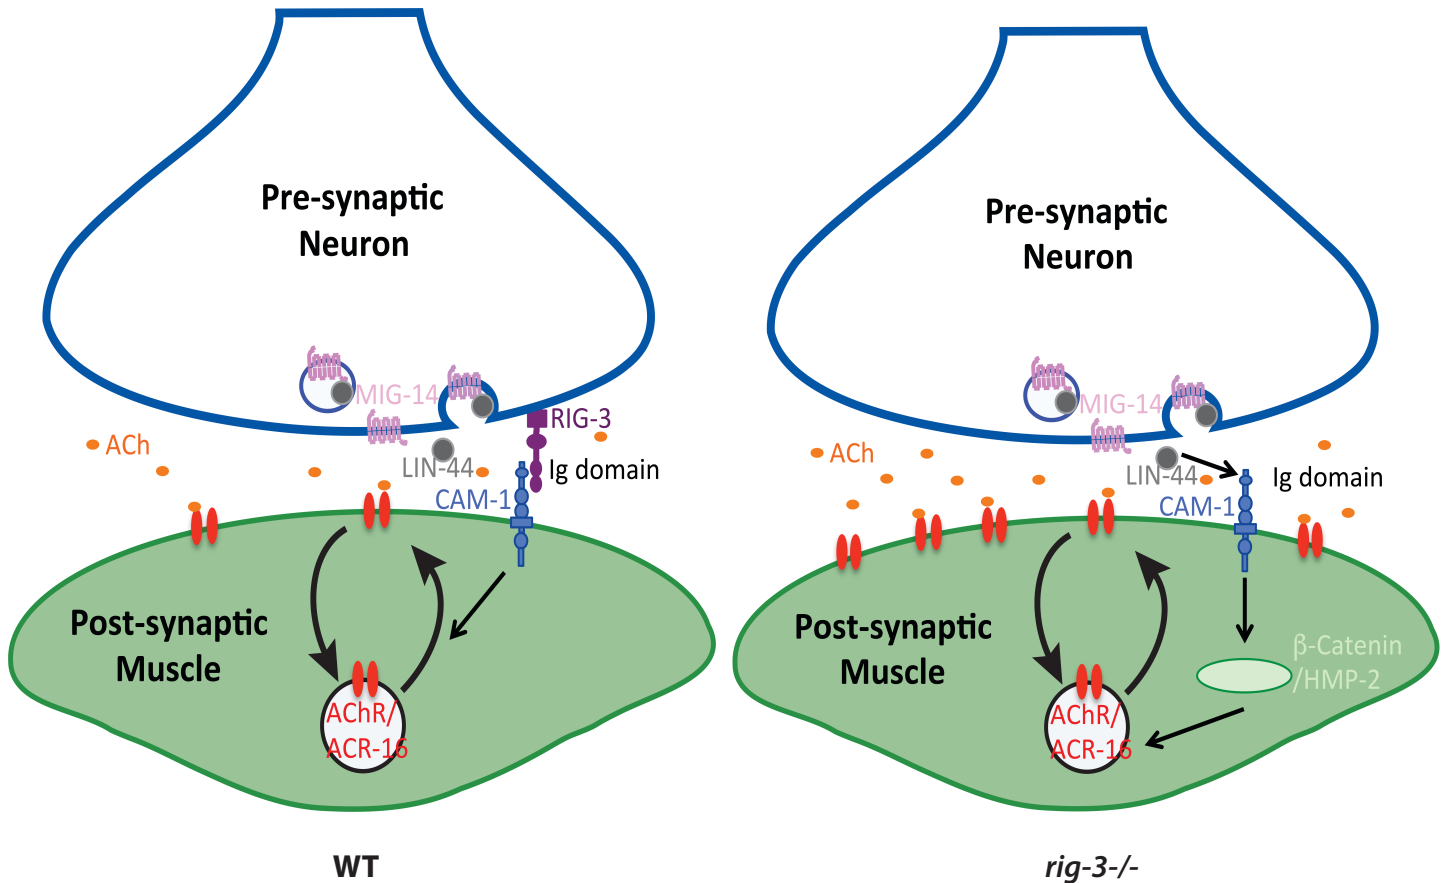

### S6. Possible model for RIG-3 function at the NMJ:

RIG-3 functions pre-synaptically in cholinergic neurons (BABU *et al.* 2011), while CAM-1 functions post-synaptically in body-wall muscle (FRANCIS *et al.* 2005) to maintain normal AChR/ACR-16 at the *C. elegans* NMJ. Previous work has shown that the Wnt signaling pathway through CWN-2 functions to maintain normal AChR/ACR-16 levels at the *C. elegans* NMJ in wild type conditions (JENSEN *et al.* 2012). We show here that in the presence of increased activity brought about by aldicarb treatment, RIG-3 (expressed in cholinergic neurons) and CAM-1 (expressed in muscles) interact trans-synaptically at the NMJ and prevent the Wnt/LIN-44 from functioning through CAM-1, thereby causing an increase in AChR/ACR-16 levels at the NMJ (shown in the image on the left-hand side). In the absence of *rig-3* and again in the presence of increased activity brought about by aldicarb exposure, there is more Wnt/LIN-44 signaling through CAM-1 and an increase in AChR/ACR-16 at the NMJ (shown in the second image).
